# Supplementary material for: Decision-Support Systems: Notions, Prototypes, and In-Use Applications With Emphasis on Military Applications
Source: Springer Nature journal article supplement (doi:10.1186/s13023-016-0505-0), 2003-01-01
Supplement: MOESM1 [file 10701042]

**Table S1.** Genes and transcripts included in multigene panel tests for retinal dystrophy and childhood cataracts

| RETINAL DYSTROPHY (n=176) |                              | CHILDHOOD CATARACT (n=114) |                                                   |
|---------------------------|------------------------------|----------------------------|---------------------------------------------------|
| Gene (HGNC)               | NCBI RefSeq transcript (r73) | Gene (HGNC)                | NCBI RefSeq transcript (r73)                      |
| ABCA4                     | NM_000350                    | ADAMTS10                   | NM_030957.2                                       |
| ABHD12                    | NM_001042472                 | ADAMTSL4                   | NM_019032.4                                       |
| ACBD5                     | NM_145698                    | AGK                        | NM_018238.3                                       |
| ADAM9                     | NM_003816                    | AGPS                       | NM_003659.3                                       |
| ADAMTS18                  | NM_199355                    | AKR1E2                     | NM_001040177.1                                    |
| AHI1                      | NM_001134832; NM_017651      | ALDH18A1                   | NM_002860.3                                       |
| AIPL1                     | NM_014336                    | B3GALT                     | NM_194318.3                                       |
| ARL2BP                    | NM_012106                    | BCOR                       | NM_017745.5;<br>NM_001123385.1;<br>NM_001123384.1 |
| ARL6                      | NM_032146                    | BFSP1                      | NM_001195.3                                       |
| BBIP1                     | NM_001195306                 | BFSP2                      | NM_003571.2                                       |
| BBS1                      | NM_024649                    | CBS                        | NM_001178008.1                                    |
| BBS10                     | NM_024685                    | CHMP4B                     | NM_176812.4                                       |
| BBS12                     | NM_001178007                 | COL2A1                     | NM_001844.4                                       |
| BBS2                      | NM_031885                    | COL4A1                     | NM_001845.4                                       |
| BBS4                      | NM_033028                    | COL11A1                    | NM_001854.3                                       |
| BBS5                      | NM_152384                    | CRYAA                      | NM_000394.2                                       |
| BBS7                      | NM_176824                    | CRYAB                      | NM_001885.1                                       |
| BBS9                      | NM_198428                    | CRYBA1                     | NM_005208                                         |
| BEST1                     | NM_004183                    | CRYBA4                     | NM_001886.2                                       |
| C1QTNF5                   | NM_015645                    | CRYBB1                     | NM_001887.3                                       |
| C2orf71                   | NM_001029883                 | CRYBB2                     | NM_000496.2                                       |
| C8ORF37                   | NM_177965                    | CRYBB3                     | NM_004076.3                                       |
| C21orf2                   | NM_004928                    | CRYGC                      | NM_020989.3                                       |
| CA4                       | NM_000717                    | CRYGD                      | NM_006891.3                                       |
| CABP4                     | NM_145200                    | CRYGS                      | NM_017541.2                                       |
| CACNA1F                   | NM_005183                    | CYP27A1                    | NM_000784.3                                       |
| CACNA2D4                  | NM_172364                    | CYP51A1                    | NM_000786.3                                       |
| CAPN5                     | NM_004055                    | DHCR7                      | NM_001360.2                                       |
| CC2D2A                    | NM_001080522                 | EPHA2                      | NM_004431.3                                       |
| CDH3                      | NM_001793                    | ERCC2                      | NM_000400.3                                       |
| CDH23                     | NM_022124                    | ERCC3                      | NM_000122.1                                       |
| CDHR1                     | NM_001171971; NM_033100      | ERCC6                      | NM_000124.2                                       |
| CEP164                    | NM_014956                    | ERCC8                      | NM_000082.3                                       |
| CEP290                    | NM_025114                    | EYA1                       | NM_172058.2; NM_172060.2                          |
| CERKL                     | NM_001030311                 | FAM126A                    | NM_032581.3                                       |
| CHM                       | NM_000390                    | FBN1                       | NM_000138.4                                       |
| CIB2                      | NM_006383                    | FKRP                       | NM_001039885.2                                    |
| CLN3                      | NM_000086                    | FKTN                       | NM_006731.2                                       |
| CLRN1                     | NM_052995; NM_001195794      | FOXC1                      | NM_001453.2                                       |
| CNGA1                     | NM_001142564                 | FOXD3                      | NM_012183.2                                       |
| CNGA3                     | NM_001298                    | FOXE3                      | NM_012186.2                                       |
| CNGB1                     | NM_001297                    | FTL                        | NM_000146.3                                       |
| CNGB3                     | NM_019098                    | FYCO1                      | NM_024513.2                                       |
| CNNM4                     | NM_020184                    | FZD4                       | NM_012193.3                                       |
| CRB1                      | NM_201253                    | GALK1                      | NM_000154.1                                       |
| CRX                       | NM_000554                    | GALT                       | NM_000155.2                                       |
| CSPP1                     | NM_024790                    | GCNT2                      | NM_145649.4; NM_145655.3;<br>NM_001491.2          |
| CYP4V2                    | NM_207352                    | GJA1                       | NM_000165.3                                       |
| DFNB31                    | NM_015404                    | GJA3                       | NM_021954.3                                       |
| DHDDS                     | NM_024887                    | GJA8                       | NM_005267.4                                       |
| DTHD1                     | NM_001136536; NM_001170700   | GNPAT                      | NM_014236.3                                       |
| EFEMP1                    | NM_001039348                 | HMX1                       | NM_018942.2                                       |
| ELOVL4                    | NM_022726                    | HSF4                       | NM_001040667.2                                    |
| EMC1                      | NM_015047                    | JAM3                       | NM_032801.3                                       |
| EYS                       | NM_001142800                 | LARGE                      | NM_004737.4                                       |
| FAM161A                   | NM_001201543                 | LMX1B                      | NM_001174146.1                                    |
| FLVCR1                    | NM_014053                    | LRP5*                      | NM_002335.2                                       |
| FSCN2                     | NM_001077182                 | LTBP2                      | NM_000428.2                                       |
| FZD4                      | NM_012193                    | MAF                        | NM_005360.4                                       |
| GNAT1                     | NM_000172                    | MAN2A                      | NM_002372.2                                       |
| GNAT2                     | NM_005272                    | MAN2B1                     | NM_000528                                         |
| GNPTG                     | NM_032520                    | MFSD6L                     | NM_152599.3                                       |
| GPR125                    | NM_145290                    | MIP                        | NM_012064.3                                       |
| GPR179                    | NM_001004334                 | MIR184                     | NR_029705.1                                       |
| GPR98                     | NM_032119                    | MYH9                       | NM_002473.4                                       |
| GRM6                      | NM_000843                    | NDP                        | NM_000266.3                                       |
| GUCA1A                    | NM_000409                    | NF2                        | NM_000268.3; NM_016418.5;<br>NM_181832.2          |

| RETINAL DYSTROPHY (n=176) |                                                              |
|---------------------------|--------------------------------------------------------------|
| Gene (HGNC)               | NCBI RefSeq transcript (r73)                                 |
| <i>GUCA1B</i>             | NM_002098                                                    |
| <i>GUCY2D</i>             | NM_000180                                                    |
| <i>HARS</i>               | NM_002109                                                    |
| <i>HMX1</i>               | NM_018942                                                    |
| <i>IDH3B</i>              | NM_006899; NM_174855                                         |
| <i>IFT140</i>             | NM_014714                                                    |
| <i>IMPDH1</i>             | NM_000883                                                    |
| <i>IMPG1</i>              | NM_001563                                                    |
| <i>IMPG2</i>              | NM_016247                                                    |
| <i>INPP5E</i>             | NM_019892                                                    |
| <i>INVS</i>               | NM_014425                                                    |
| <i>IQCB1</i>              | NM_001023570                                                 |
| <i>ITM2B</i>              | NM_021999                                                    |
| <i>KCNJ13</i>             | NM_002242                                                    |
| <i>KCNV2</i>              | NM_133497                                                    |
| <i>KIAA1549</i>           | NM_001164665; NM_020910                                      |
| <i>KIF11</i>              | NM_004523                                                    |
| <i>KLHL7</i>              | NM_001031710                                                 |
| <i>LCA5</i>               | NM_181714                                                    |
| <i>LRAT</i>               | NM_004744                                                    |
| <i>LRP5*</i>              | NM_002335                                                    |
| <i>LZTFL1</i>             | NM_020347                                                    |
| <i>MERTK</i>              | NM_006343                                                    |
| <i>MFRP</i>               | NM_031433                                                    |
| <i>MKKS</i>               | NM_018848                                                    |
| <i>MKS1</i>               | NM_017777; NM_001165927                                      |
| <i>MVK</i>                | NM_000431                                                    |
| <i>MYO7A</i>              | NM_000260                                                    |
| <i>NDP</i>                | NM_000266                                                    |
| <i>NEK2</i>               | NM_002497                                                    |
| <i>NMNAT1</i>             | NM_0022787                                                   |
| <i>NPHP1</i>              | NM_000272                                                    |
| <i>NPHP3</i>              | NM_153240                                                    |
| <i>NPHP4</i>              | NM_015102                                                    |
| <i>NR2E3</i>              | NM_014249                                                    |
| <i>NRL</i>                | NM_006177                                                    |
| <i>NYX</i>                | NM_022567                                                    |
| <i>OAT</i>                | NM_000274                                                    |
| <i>OFD1</i>               | NM_003611                                                    |
| <i>OTX2</i>               | NM_021728                                                    |
| <i>PANK2</i>              | NM_153638                                                    |
| <i>PCDH15</i>             | NM_001142763;<br>NM_001142769;<br>NM_001142770; NM_001142771 |
| <i>PCYT1A</i>             | NM_005017                                                    |
| <i>PDE6A</i>              | NM_000440                                                    |
| <i>PDE6B</i>              | NM_000283                                                    |
| <i>PDE6C</i>              | NM_006204                                                    |
| <i>PDE6G</i>              | NM_002602                                                    |
| <i>PEX1</i>               | NM_000466                                                    |
| <i>PEX2</i>               | NM_000318                                                    |
| <i>PEX7</i>               | NM_000288                                                    |
| <i>PHYH</i>               | NM_006214                                                    |
| <i>PITPNM3</i>            | NM_031220                                                    |
| <i>PLA2G5</i>             | NM_000929                                                    |
| <i>PRCD</i>               | NM_001077620                                                 |
| <i>PROM1</i>              | NM_006017                                                    |
| <i>PRPF3</i>              | NM_004698                                                    |
| <i>PRPF31</i>             | NM_015629                                                    |
| <i>PRPF4</i>              | NM_004697                                                    |
| <i>PRPF6</i>              | NM_012469                                                    |
| <i>PRPF8</i>              | NM_006445                                                    |
| <i>PRPH2</i>              | NM_000322                                                    |
| <i>RAB28</i>              | NM_001017979                                                 |
| <i>RAX2</i>               | NM_032753                                                    |
| <i>RBP3</i>               | NM_002900                                                    |
| <i>RBP4</i>               | NM_006744                                                    |
| <i>RD3</i>                | NM_183059                                                    |
| <i>RDH12</i>              | NM_152443                                                    |
| <i>RDH5</i>               | NM_001199771                                                 |
| <i>RGR</i>                | NM_002921                                                    |

| CHILDHOOD CATARACT (n=114) |                                                   |
|----------------------------|---------------------------------------------------|
| Gene (HGNC)                | NCBI RefSeq transcript (r73)                      |
| <i>NHS</i>                 | NM_198270.2; NM_001136024.2                       |
| <i>OCRL</i>                | NM_000276.3                                       |
| <i>OPA3</i>                | NM_001017989.2;<br>NM_025136.3                    |
| <i>PAX6</i>                | NM_001604.4                                       |
| <i>PEX1</i>                | NM_000466.2                                       |
| <i>PEX12</i>               | NM_000286.2                                       |
| <i>PEX13</i>               | NM_002618.3                                       |
| <i>PEX16</i>               | NM_057174.2; NM_004813.2                          |
| <i>PEX2</i>                | NM_001172086.1                                    |
| <i>PEX26</i>               | NM_017929.5                                       |
| <i>PEX3</i>                | NM_003630.2                                       |
| <i>PEX6</i>                | NM_000287.3                                       |
| <i>PEX7</i>                | NM_000288.3                                       |
| <i>PEX5L</i>               | NM_016559.2                                       |
| <i>PEX10</i>               | NM_153818.1                                       |
| <i>PEX11</i>               | NM_003846.2                                       |
| <i>PEX14</i>               | NM_004565.2                                       |
| <i>PEX19</i>               | NM_002857.3                                       |
| <i>PITX2</i>               | NM_000325.5; NM_153426.1                          |
| <i>PITX3</i>               | NM_005029.3                                       |
| <i>POMT1</i>               | NM_007171.3                                       |
| <i>POMT2</i>               | NM_013382.5                                       |
| <i>PVRL3</i>               | NM_015480.1                                       |
| <i>PXDN</i>                | NM_012293.1                                       |
| <i>RAB18</i>               | NM_021252.3; NM_001256410                         |
| <i>RAB3GAP1</i>            | NM_001172435.1                                    |
| <i>RAB3GAP2</i>            | NM_012414.3                                       |
| <i>RNLS</i>                | NM_001031709.2; NM_018363.3                       |
| <i>SC5DL</i>               | NM_001024956.2                                    |
| <i>SEC23A</i>              | NM_006364.2                                       |
| <i>SIL1</i>                | NM_001037633.1                                    |
| <i>SIX5</i>                | NM_175875.4                                       |
| <i>SIX6</i>                | NM_007374.2                                       |
| <i>SLC16A12</i>            | NM_213606.3                                       |
| <i>SLC2A1</i>              | NM_006516.2                                       |
| <i>SLC33A1</i>             | NM_004733.3                                       |
| <i>SOLH</i>                | NM_005632.2                                       |
| <i>SOX2</i>                | NM_003106.3                                       |
| <i>SRD5A3</i>              | NM_024592.4                                       |
| <i>SREBF2</i>              | NM_004599.2                                       |
| <i>TDRD7</i>               | NM_014290.2                                       |
| <i>TFAP2A</i>              | NM_003220.2;<br>NM_001042425.1;<br>NM_001032280.2 |
| <i>TMEM70</i>              | NM_017866.5                                       |
| <i>TMEM114</i>             | NM_001146336.1                                    |
| <i>VIM</i>                 | NM_003380.3                                       |
| <i>VSX2</i>                | NM_182894.2                                       |
| <i>WRN</i>                 | NM_000553.4                                       |

| <b>RETINAL DYSTROPHY (n=176)</b> |                                          |
|----------------------------------|------------------------------------------|
| <b>Gene (HGNC)</b>               | <b>NCBI RefSeq transcript (r73)</b>      |
| RGS9                             | NM_003835; NM_001165933                  |
| RHO                              | NM_000539                                |
| RIMS1                            | NM_014989; NM_001168407;<br>NM_001168410 |
| RLBP1                            | NM_000326                                |
| ROM1                             | NM_000327                                |
| RP1                              | NM_006269                                |
| RP1L1*                           | NM_178857                                |
| RP2                              | NM_006915                                |
| RP9                              | NM_203288                                |
| RPE65                            | NM_000329                                |
| RPGR*                            | NM_001034853                             |
| RPGRIP1                          | NM_020366                                |
| RPGRIP1L                         | NM_015272                                |
| RS1                              | NM_000330                                |
| SAG                              | NM_000541                                |
| SDCCAG8                          | NM_006642                                |
| SEMA4A                           | NM_022367                                |
| SLC24A1                          | NM_004727; NM_001254740                  |
| SNRNP200                         | NM_014014                                |
| SPATA7                           | NM_018418                                |
| TEAD1                            | NM_021961                                |
| TIMP3                            | NM_000362                                |
| TMEM237                          | NM_001044385                             |
| TOPORS                           | NM_005802                                |
| TRIM32                           | NM_012210                                |
| TRPM1                            | NM_002420                                |
| TSPAN12                          | NM_012338                                |
| TTC8                             | NM_144596                                |
| TUB                              | NM_177972                                |
| TULP1                            | NM_003322                                |
| UNC119                           | NM_005148; NM_054035                     |
| USH1C                            | NM_005709; NM_153676                     |
| USH1G                            | NM_173477                                |
| USH2A                            | NM_206933                                |
| VCAN                             | NM_004385                                |
| VPS13B                           | NM_017890                                |
| WDPCP                            | NM_015910                                |
| WDR19                            | NM_025132                                |
| ZNF423                           | NM_015069                                |
| ZNF513                           | NM_144631                                |

\* The following regions were not analysed as they have little or no coverage due to technical limitations of the technology used: exon 1 of LRP5, exon 1 of MAF, exon 4 of RP1L1 and exon ORF15 of RPGR.

**Table S2.** Clinical and in silico evaluation of small ( $\leq 21$  nucleotides) in-frame insertions/deletions identified by panel-based genetic diagnostic testing in 486 probands with retinal dystrophy and 181 probands with childhood cataract.

| Presumed number of alleles                                              | Gene (HGNC) | NCBI RefSeq transcript (r73) | Sequence change (Mutalyzer 2.0.15) | Protein change (Mutalyzer 2.0.15) | DDG-in status [probability] | SIFT-indelet effect [score] | PROVEAN prediction [score] | Previously reported (Ensembl r83) | Homopolymer run (HR) or tandem repeat (TR) | Status  | Mode of inheritance associated with gene (OMIM) | Clinically reported ^                             |
|-------------------------------------------------------------------------|-------------|------------------------------|------------------------------------|-----------------------------------|-----------------------------|-----------------------------|----------------------------|-----------------------------------|--------------------------------------------|---------|-------------------------------------------------|---------------------------------------------------|
| <b>RETINAL DYSTROPHY (176 genes evaluated; 486 individuals tested)</b>  |             |                              |                                    |                                   |                             |                             |                            |                                   |                                            |         |                                                 |                                                   |
| 2                                                                       | ABCA4       | NM_000350.2                  | c.3840_3845del                     | p.(Asp1281_Ser1282del)            | N [80.10]                   | N [0.918]                   | N [-2.04]                  | rs62642572; see also Table S3     | no HR/TR                                   | het     | AR                                              | yes (probably accounts for clinical presentation) |
| 1                                                                       | ADGRA3      | NM_145290.3                  | c.98_106del                        | p.(Gly33_Gly35del)                | N [86.40]                   | N [0.696]                   | N [0.94]                   | no                                | TR                                         | het     | AR                                              | yes (unknown clinical significance)               |
| 8                                                                       | ADGRA3      | NM_145290.3                  | c.104_106del                       | p.(Gly35del)                      | N [94.80]                   | N [0.696]                   | N [1.43]                   | rs769005255                       | TR                                         | unknown | AR                                              | no (unknown clinical significance)                |
| 5                                                                       | C2orf71     | NM_001029883.2               | c.3264_3266del                     | p.(Pro1089del)                    | N [89.50]                   | N [0.696]                   | D [-9.33]                  | rs138020654                       | no HR/TR                                   | unknown | AR                                              | no (unknown clinical significance)                |
| 1                                                                       | C1QTNF5     | NM_015645.3                  | c.163_171dup                       | p.(Arg55_Gly57dup)                | N [69.30]                   | D [0.943]                   | N [-1.75]                  | no                                | TR                                         | het     | AD                                              | no (unknown clinical significance)                |
| 11                                                                      | CACNA1F     | NM_005183.3                  | c.2442_2444dup                     | p.(Glu825dup)                     | N [91.50]                   | N [0.696]                   | N [-0.89]                  | rs112450928                       | TR                                         | unknown | XL                                              | no (unknown clinical significance)                |
| 1                                                                       | CACNA1F     | NM_005183.3                  | c.2457_2474dup                     | p.(Glu820_Glu825dup)              | N [80.60]                   | N [0.696]                   | N [0.59]                   | no                                | TR                                         | het     | XL                                              | no (unknown clinical significance)                |
| 21                                                                      | CC2D2A      | NM_001080522.2               | c.685_687del                       | p.(Glu229del)                     | N [89.40]                   | N [0.696]                   | N [-0.76]                  | rs386833764, rs112367037          | TR                                         | unknown | AR                                              | no (unknown clinical significance)                |
| 1                                                                       | CDHR1       | NM_033100.3                  | c.690_692del                       | p.(Thr231del)                     | D [83.20]                   | D [0.894]                   | D [-5.96]                  | no                                | TR                                         | hom     | AR                                              | yes (possibly accounts for clinical presentation) |
| 1                                                                       | CEP164      | NM_014956.4                  | c.799_801del                       | p.(Lys267del)                     | N [90.20]                   | D [0.667]                   | N [-0.40]                  | rs764638875                       | TR                                         | unknown | AR                                              | no (unknown clinical significance)                |
| 1                                                                       | CEP164      | NM_014956.4                  | c.3934_3939dup                     | p.(Pro1312_Thr1313dup)            | N [92.00]                   | D [0.667]                   | N [-1.25]                  | rs749695145                       | TR                                         | unknown | AR                                              | no (unknown clinical significance)                |
| 1                                                                       | CHM         | NM_000390.2                  | c.1922_1933dup                     | p.(Asn644_Leu645insGlnSerThrAsn)  | N [87.30]                   | D [0.667]                   | N [-0.82]                  | rs767043768                       | no HR/TR                                   | hemi    | XL                                              | yes (possibly accounts for clinical presentation) |
| 4                                                                       | CNGB1       | NM_001297.4                  | c.1101_1103dup                     | p.(Glu371dup)                     | N [89.30]                   | N [0.696]                   | N [-0.74]                  | rs374653770, rs753335204          | TR                                         | unknown | AR                                              | no (unknown clinical significance)                |
| 1                                                                       | CNGB1       | NM_001297.4                  | c.1659_1670del                     | p.(Ala554_Ala557del)              | N [77.00]                   | N [0.918]                   | D [-15.06]                 | rs769138379                       | no HR/TR                                   | unknown | AR                                              | no (unknown clinical significance)                |
| 1                                                                       | CNGB3       | NM_019098.4                  | c.2179_2199del                     | p.(Gln727_Lys733del)              | N [87.30]                   | N [0.696]                   | N [1.46]                   | rs746549330                       | no HR/TR                                   | unknown | AR                                              | no (unknown clinical significance)                |
| 1                                                                       | CNNM4       | NM_020184.3                  | c.2203_2211del                     | p.(Gly735_Thr737del)              | N [86.60]                   | N [0.918]                   | D [-2.73]                  | rs550956407                       | TR                                         | unknown | AR                                              | no (unknown clinical significance)                |
| 3                                                                       | CRB1        | NM_201253.2                  | c.498_506del                       | p.(Ile167_Gly169del)              | D [84.80]                   | D [0.894]                   | D [-14.26]                 | rs748136623                       | no HR/TR                                   | het     | AR, AD                                          | yes (probably accounts for clinical presentation) |
| 1                                                                       | DFNB31      | NM_015404.3                  | c.376_378del                       | p.(Ala126del)                     | N [89.00]                   | D [0.765]                   | N [-1.08]                  | rs777938907                       | no HR/TR                                   | unknown | AR                                              | no (unknown clinical significance)                |
| 1                                                                       | EYS         | NM_001142800.1               | c.8427_8432del                     | p.(Thr2810_Lys2811del)            | D [58.40]                   | N [0.636]                   | D [-4.10]                  | no                                | no HR/TR                                   | het     | AR                                              | no (unknown clinical significance)                |
| 1                                                                       | FLVCR1      | NM_014053.3                  | c.774_779dup                       | p.(Leu259_Val260dup)              | D [85.60]                   | D [0.943]                   | D [-9.97]                  | rs749580355                       | no HR/TR                                   | het     | AR                                              | yes (possibly accounts for clinical presentation) |
| 1                                                                       | FSCN2       | NM_001077182.2               | c.1071_1073del                     | p.(Lys357del)                     | D [87.20]                   | D [0.894]                   | D [-12.50]                 | rs760309853                       | TR                                         | het     | AD                                              | no (unknown clinical significance)                |
| 2                                                                       | GUCY2D      | NM_000180.3                  | c.129_134del                       | p.(Leu44_Leu45del)                | N [54.30]                   | N [0.918]                   | N [-1.78]                  | rs552184470                       | no HR/TR                                   | unknown | AR, AD                                          | no (unknown clinical significance)                |
| 1                                                                       | INPP5E      | NM_019892.4                  | c.560_561insGCTGCCCAT              | p.(Ser187delinsArgLeuProlle)      | N [89.90]                   | N [0.918]                   | D [-3.44]                  | rs769234632                       | TR                                         | het     | AR                                              | yes (does not account for clinical presentation)  |
| 1                                                                       | IFT140      | NM_014714.3                  | c.3955_3960del                     | p.(Ala1319_Lys1320del)            | D [77.90]                   | D [0.667]                   | D [-4.36]                  | rs746697405                       | TR                                         | unknown | AR                                              | no (unknown clinical significance)                |
| 1                                                                       | NPHP4       | NM_015102.4                  | c.1306_1314dup                     | p.(Lys436_Val438dup)              | N [81.80]                   | n/a                         | D [-5.49]                  | rs747743472                       | TR                                         | unknown | AR                                              | no (unknown clinical significance)                |
| 1                                                                       | MYO7A       | NM_000260.3                  | c.6614_6634dup                     | p.(Met2205_Ser2211dup)            | D [95.40]                   | D [0.667]                   | D [-6.14]                  | rs111033388                       | no HR/TR                                   | unknown | AR                                              | no (unknown clinical significance)                |
| 1                                                                       | NRL         | NM_006177.3                  | c.366_368del                       | p.(Ala123del)                     | N [92.60]                   | N [0.918]                   | D [-2.65]                  | no                                | no HR/TR                                   | het     | AD, AR                                          | no (unknown clinical significance)                |
| 1                                                                       | NYX         | NM_022567.2                  | c.106_111del                       | p.(Ala36_Cys37del)                | D [92.70]                   | D [0.894]                   | D [-7.77]                  | no                                | TR                                         | hemi    | XL                                              | yes (unknown clinical significance)               |
| 1                                                                       | OFD1        | NM_003611.2                  | c.2467_2469del                     | p.(Glu823del)                     | N [93.20]                   | N [0.696]                   | D [-4.81]                  | rs771984968                       | TR                                         | unknown | AR                                              | no (unknown clinical significance)                |
| 2                                                                       | PCDH15      | NM_001142763.1               | c.5275_5277del                     | p.(Pro1759del)                    | N [93.40]                   | N [0.696]                   | N [0.47]                   | rs397517462                       | TR                                         | unknown | AR                                              | no (unknown clinical significance)                |
| 1                                                                       | PCDH15      | NM_001142763.1               | c.5308_5313del                     | p.(Ala1770_Pro1771del)            | N [88.50]                   | D [0.667]                   | N [-0.65]                  | rs397517465                       | TR                                         | unknown | AR                                              | no (unknown clinical significance)                |
| 1                                                                       | PCDH15      | NM_001142763.1               | c.5390_5395del                     | p.(Leu1797_Pro1798del)            | N [90.30]                   | N [0.696]                   | N [-0.72]                  | rs779691085                       | TR                                         | unknown | AR                                              | no (unknown clinical significance)                |
| 5                                                                       | PCDH15      | NM_001142763.1               | c.5622_5624del                     | p.(Thr1876del)                    | N [93.20]                   | N [0.696]                   | N [-0.09]                  | rs113363047                       | TR                                         | unknown | AR                                              | no (unknown clinical significance)                |
| 1                                                                       | PRPH2       | NM_000322.4                  | c.603_620del                       | p.(Arg203_Gly208del)              | D [97.40]                   | D [0.894]                   | D [-28.17]                 | no                                | no HR/TR                                   | het     | AD, AR                                          | yes (probably accounts for clinical presentation) |
| 1                                                                       | RAX2        | NM_032753.3                  | c.417_422dup                       | p.(Pro140_Gly141dup)              | N [86.30]                   | D [0.667]                   | D [-3.59]                  | rs549932754                       | TR                                         | unknown | AD                                              | no (unknown clinical significance)                |
| 1                                                                       | RP2         | NM_006915.2                  | c.260_268del                       | p.(Thr87_Cys89del)                | D [97.50]                   | D [0.894]                   | D [-22.94]                 | no                                | no HR/TR                                   | hemi    | XL                                              | yes (possibly accounts for clinical presentation) |
| 1                                                                       | RPE65       | NM_000329.2                  | c.1443_1445del                     | p.(Glu481del)                     | D [87.20]                   | D [0.894]                   | D [-11.24]                 | no                                | TR                                         | het     | XL                                              | yes (probably accounts for clinical presentation) |
| 1                                                                       | RS1         | NM_000330.3                  | c.496_498del                       | p.(Tyr166del)                     | D [85.00]                   | D [0.894]                   | D [-9.84]                  | CD136241; see also Table S3       | TR                                         | hemi    | XL                                              | yes (probably accounts for clinical presentation) |
| 1                                                                       | RS1         | NM_000330.3                  | c.592_600dup                       | p.(Phe198_Arg200dup)              | D [94.30]                   | D [0.894]                   | D [-11.00]                 | no                                | no HR/TR                                   | hemi    | XL                                              | yes (probably accounts for clinical presentation) |
| 1                                                                       | SLC24A1     | NM_004727.2                  | c.2071_2073del                     | p.(Lys691del)                     | N [93.00]                   | N [0.918]                   | N [-0.34]                  | rs748047300                       | TR                                         | unknown | AR                                              | no (unknown clinical significance)                |
| 2                                                                       | SLC24A1     | NM_004727.2                  | c.2658_2660del                     | p.(Glu890del)                     | N [91.50]                   | D [0.667]                   | N [-0.46]                  | rs765607758                       | TR                                         | unknown | AR                                              | no (unknown clinical significance)                |
| 2                                                                       | TULP1       | NM_003322.4                  | c.371_394del                       | p.(Asp124_Glu131del)              | N [85.30]                   | N [0.918]                   | D [-5.59]                  | rs281865169, rs558243084          | TR                                         | unknown | AR                                              | no (unknown clinical significance)                |
| 1                                                                       | VCAN        | NM_004385.4                  | c.4183_4185del                     | p.(Glu1395del)                    | N [90.80]                   | N [0.918]                   | N [-2.01]                  | rs758450587                       | TR                                         | het     | AD                                              | no (unknown clinical significance)                |
| 2                                                                       | VPS13B      | NM_017890.4                  | c.8833_8834insGAA                  | p.(Pro2945delinsArgThr)           | N [63.60]                   | D [0.765]                   | D [-6.17]                  | rs758685660                       | no HR/TR                                   | unknown | AR                                              | no (unknown clinical significance)                |
| <b>CHILDHOOD CATARACT (114 genes evaluated; 181 individuals tested)</b> |             |                              |                                    |                                   |                             |                             |                            |                                   |                                            |         |                                                 |                                                   |
| 1                                                                       | BFSP2       | NM_003571.3                  | c.697_699del                       | p.(Glu233del)                     | D [88.50]                   | D [0.943]                   | D [-14.08]                 | rs121908938; see also Table S3    | TR                                         | het     | AD                                              | yes (probably accounts for clinical presentation) |
| 1                                                                       | CAPN15      | NM_005632.2                  | c.376_381del                       | p.(Lys126_Asp127del)              | N [87.60]                   | N [0.918]                   | N [-1.56]                  | rs771271054                       | no HR/TR                                   | unknown | AD                                              | no (unknown clinical significance)                |
| 1                                                                       | CRYBA1      | NM_005208.4                  | c.272_274del                       | p.(Gly91del)                      | D [87.60]                   | D [0.894]                   | D [-15.88]                 | CD040165; see also Table S3       | TR                                         | het     | AD                                              | yes (probably accounts for clinical presentation) |
| 1                                                                       | CRYBA4      | NM_001886.2                  | c.136_156del                       | p.(Ser46_Gly52del)                | D [98.80]                   | D [0.894]                   | D [-29.50]                 | no                                | no HR/TR                                   | het     | AD                                              | yes (probably accounts for clinical presentation) |
| 1                                                                       | CRYGC       | NM_020989.3                  | c.61_63del                         | p.(Thr21del)                      | D [88.40]                   | D [0.846]                   | D [-8.17]                  | no                                | no HR/TR                                   | het     | AD                                              | yes (probably accounts for clinical presentation) |
| 1                                                                       | FOXC1       | NM_001453.2                  | c.1139_1141del                     | p.(Gly380del)                     | N [91.10]                   | N [0.696]                   | N [-0.50]                  | rs751183793                       | TR                                         | het     | AD                                              | no (unknown clinical significance)                |
| 2                                                                       | FOXC1       | NM_001453.2                  | c.1359_1361dup                     | p.(Gly456dup)                     | N [91.10]                   | D [0.667]                   | N [-0.88]                  | rs572346201                       | TR                                         | het     | AD                                              | no (unknown clinical significance)                |
| 1                                                                       | FOXC1       | NM_001453.2                  | c.1476_1481del                     | p.(Ala494_Ala495del)              | N [83.40]                   | N [0.696]                   | N [-1.86]                  | rs771540524                       | TR                                         | het     | AD                                              | no (unknown clinical significance)                |
| 1                                                                       | MAF         | NM_001031804.2               | c.696_701dup                       | p.(Gly237_Gly238dup)              | N [89.00]                   | N [0.696]                   | N [-0.86]                  | no                                | TR                                         | het     | AD                                              | no (unknown clinical significance)                |
| 1                                                                       | NHS         | NM_198270.2                  | c.216_218del                       | p.(Pro73del)                      | N [92.70]                   | D [0.667]                   | N [-0.49]                  | rs10590816                        | TR                                         | hemi    | XL                                              | no (unknown clinical significance)                |
| 1                                                                       | PITX2       | NM_000325.5                  | c.429_431del                       | p.(Arg144del)                     | N [62.40]                   | D [0.943]                   | D [-13.92]                 | no                                | TR                                         | het     | AD                                              | yes (probably accounts for clinical presentation) |

N corresponds to neutral (colour-coded in dark green), D corresponds to disease, damaging or deleterious (colour-coded in dark red).

Het, hom and hemi corresponds to heterozygous, homozygous and hemizygous; in variants with 'unknown' status, the zygosity was not confirmed by Sanger sequencing.

HR corresponds to homopolymer run (i.e. the variant is within a run of six or more identical bases) and TR corresponds to tandem repeat (i.e. the variant is within a segment of at least two repeated sequences).

AR, AD and XL correspond to autosomal recessive, autosomal dominant or X-linked recessive mode of inheritance.

^ Clinically reported variants are coded in red ('probably accounts for clinical presentation'), light orange ('possibly accounts for clinical presentation') or grey ('unknown clinical significance' or 'does not account for clinical presentation'). Variants that were not clinically reported are coded in light green.

**Table S3.** Previously reported disease-associated small in-frame insertions/deletions in genes found to have clinically reported variants in the present study

| <b>Gene</b>   | <b>Sequence change</b>  | <b>Protein change</b>          | <b>First report</b> |
|---------------|-------------------------|--------------------------------|---------------------|
| <i>BFSP2</i>  | c.697_699delGAA         | p.(Glu233del)                  | 1 †                 |
| <i>CRYBA1</i> | c.272_274del            | p.(Gly91del)                   | 2 †                 |
| <i>ABCA4</i>  | c.38_46del              | p.(Lys13_Trp15del)             | 3                   |
| <i>ABCA4</i>  | c.1506_1514del          | p.(Phe503_Ile505del)           | 4                   |
| <i>ABCA4</i>  | c.2183_2194del          | p.(Ser728_Phe731del)           | 5                   |
| <i>ABCA4</i>  | c.2291_2305del          | p.(Cys764_Ile768del)           | 6                   |
| <i>ABCA4</i>  | c.2625_2626insTTT       | p.(Leu875_Gln876insPhe)        | 7                   |
| <i>ABCA4</i>  | c.3449_3451del          | p.(Cys1150del)                 | 8                   |
| <i>ABCA4</i>  | c.3840_3845del          | p.(Asp1281_Ser1282del)         | 9 †                 |
| <i>ABCA4</i>  | c.4249_4251delTTC       | p.(Phe1417del)                 | 10                  |
| <i>ABCA4</i>  | c.4735_4739delinsCC     | p.(Phe1579_Leu1580delinsPro)   | 11                  |
| <i>ABCA4</i>  | c.5216_5218dup          | p.(Ala1739dup)                 | 12                  |
| <i>ABCA4</i>  | c.5281_5289del          | p.(Pro1761_Leu1763del)         | 13                  |
| <i>ABCA4</i>  | c.5668_5670del          | p.(Phe1890del)                 | 14                  |
| <i>CDHR1</i>  | c.1311_1316del          | p.(Leu437_Thr438del)           | 15                  |
| <i>CHM</i>    | c.872_880del            | p.(Glu291_Met294delinsVal)     | 16                  |
| <i>CRB1</i>   | c.498_506del            | p.(Ile167_Gly169del)           | 17                  |
| <i>CRB1</i>   | c.2245_2247del          | p.(Ser749del)                  | 18                  |
| <i>CRB1</i>   | c.2365_2367del          | p.(Asn789del)                  | 19                  |
| <i>CRB1</i>   | c.2886_2888del          | p.(Leu962del)                  | 18                  |
| <i>NYX</i>    | c.302_304del            | p.(Ile101del)                  | 20                  |
| <i>NYX</i>    | c.339_353del            | p.(Glu114_Alal118del)          | 21                  |
| <i>NYX</i>    | c.340_354del            | p.(Glu114_Alal118del)          | 20                  |
| <i>NYX</i>    | c.619_627dup            | p.(Arg207_Arg209dup)           | 20                  |
| <i>NYX</i>    | c.620_628dup            | p.(Arg209_Ser210insCysLeuArg)  | 22                  |
| <i>NYX</i>    | c.732_743del            | p.(Glu244_Alal247del)          | 20                  |
| <i>NYX</i>    | c.1370_1387del          | p.(Gln457_Alal463delinsPro)    | 23                  |
| <i>PRPH2</i>  | c.198_202delinsAAGACACA | p.(Met67_Gly68delinsArgHisArg) | 24                  |
| <i>PRPH2</i>  | c.199_201del            | p.(Met67del)                   | 25                  |
| <i>PRPH2</i>  | c.356_358del            | p.(Cys119del)                  | 26                  |
| <i>PRPH2</i>  | c.461_463del            | p.(Lys154del)                  | 27                  |
| <i>PRPH2</i>  | c.505_507del            | p.(Asn169del)                  | 28                  |
| <i>PRPH2</i>  | c.577_579del            | p.(Lys193del)                  | 25                  |
| <i>PRPH2</i>  | c.616_627del            | p.(Val206_Val209del)           | 29                  |
| <i>PRPH2</i>  | c.618_626del            | p.(Asp207_Val209del)           | 30                  |
| <i>PRPH2</i>  | c.656_658del            | p.(Pro219del)                  | 31                  |
| <i>PRPH2</i>  | c.711_722del            | p.(Asp237_Thr240del)           | 32                  |
| <i>PRPH2</i>  | c.811_813del            | p.(Leu271del)                  | 33                  |
| <i>PRPH2</i>  | c.914_922del            | p.(Gly305_Leu308delinsVal)     | 34                  |

| Gene         | Sequence change   | Protein change          | First report |
|--------------|-------------------|-------------------------|--------------|
| <i>RP2</i>   | c.14_16del        | p.(Phe5del)             | 35           |
| <i>RP2</i>   | c.16_18del        | p.(Ser6del)             | 36           |
| <i>RP2</i>   | c.409_411del      | p.(Ile137del)           | 37           |
| <i>RPE65</i> | c.106_114del      | p.(Leu36_Leu38del)      | 38           |
| <i>RPE65</i> | c.991_993dup      | p.(Trp331dup)           | 39           |
| <i>RPE65</i> | c.1046_1047insTGG | p.(Asn349_Trp350insGly) | 40           |
| <i>RS1</i>   | c.253_255del      | p.(Asn85del)            | 41           |
| <i>RS1</i>   | c.306_308dup      | p.(Leu103dup)           | 42           |
| <i>RS1</i>   | c.327_329del      | p.(Cys110del)           | 43           |
| <i>RS1</i>   | c.496_498del      | p.(Tyr166del)           | 44 †         |

The following genes were investigated for previously reported disease-associated small in-frame insertions/deletions (indels): *BFSP2*, *CRYBA1*, *CRYBA4*, *CRYGC*, *PITX2*, *ABCA4*, *ADGRA3*, *CDHR1*, *CHM*, *CRB1*, *FLVCR1*, *INPP5E*, *NYX*, *PRPH2*, *RP2*, *RPE65* and *RS1*. These were selected as they were the genes in which clinically reported small in-frame indels were identified in the studied cohort (see text for more information). The Human Gene Mutation Database (HGMD Professional release 2016.2) and Ensembl Release 83 datasets were inspected (accessed 28 Jul 2016). No disease-associated small in-frame indels were detected in *CRYBA4*, *CRYGC*, *PITX2*, *ADGRA3*, *FLVCR1* and *INPP5E*. For information on transcripts used please refer to Table S2.

† suggests that the variant was also identified in the present cohort .

## REFERENCES

1. Jakobs PM, Hess JF, FitzGerald PG, Kramer P, Weleber RG, Litt M: Autosomal-dominant congenital cataract associated with a deletion mutation in the human beaded filament protein gene *BFSP2*. *Am J Hum Genet* 2000; 66: 1432-1436.
2. Qi Y, Jia H, Huang S, et al: A deletion mutation in the betaA1/A3 crystallin gene (*CRYBA1/A3*) is associated with autosomal dominant congenital nuclear cataract in a Chinese family. *Hum Genet* 2004; 114: 192-197.
3. Briggs CE, Rucinski D, Rosenfeld PJ, Hirose T, Berson EL, Dryja TP: Mutations in *ABCR* (*ABCA4*) in patients with Stargardt macular degeneration or cone-rod degeneration. *Invest Ophthalmol Vis Sci* 2001; 42: 2229-2236.
4. Jaakson K, Zernant J, Klm M, et al: Genotyping microarray (gene chip) for the *ABCR* (*ABCA4*) gene. *Hum Mutat* 2003; 22: 395-403.
5. Simonelli F, Testa F, Zernant J, et al: Genotype-phenotype correlation in Italian families with Stargardt disease. *Ophthalmic Res* 2005; 37: 159-167.
6. Chen Y, Ratnam K, Sundquist SM, et al: Cone photoreceptor abnormalities correlate with vision loss in patients with Stargardt disease. *Invest Ophthalmol Vis Sci*. 2011; 52: 3281-3292.
7. Testa F, Rossi S, Sodi A, et al: Correlation between photoreceptor layer integrity and visual function in patients with Stargardt disease: implications for gene therapy. *Invest Ophthalmol Vis Sci* 2012; 53: 4409-4415.

8. Beit-Ya'acov A, Mizrahi-Meissonnier L, Obolensky A, et al: Homozygosity for a novel ABCA4 founder splicing mutation is associated with progressive and severe Stargardt-like disease. *Invest Ophthalmol Vis Sci* 2007 ; 48:4308-4314.
9. Webster AR, Héon E, Lotery AJ, et al: An analysis of allelic variation in the ABCA4 gene. *Invest Ophthalmol Vis Sci* 2001; 42: 1179-1189.
10. Chacón-Camacho OF, Granillo-Alvarez M, Ayala-Ramírez R, Zenteno JC: ABCA4 mutational spectrum in Mexican patients with Stargardt disease: Identification of 12 novel mutations and evidence of a founder effect for the common p.A1773V mutation. *Exp Eye Res* 2013; 109: 77-82.
11. Stenirri S, Alaimo G, Manitto MP, Brancato R, Ferrari M, Cremonesi L: Are microarrays useful in the screening of ABCA4 mutations in Italian patients affected by macular degenerations? *Clin Chem Lab Med* 2008; 46: 1250-1255.
12. Fujinami K, Zernant J, Chana RK, et al: Clinical and molecular characteristics of childhood-onset Stargardt disease. *Ophthalmology* 2015; 122: 326-334.
13. Lewis RA, Shroyer NF, Singh N, et al: Genotype/Phenotype analysis of a photoreceptor-specific ATP-binding cassette transporter gene, ABCR, in Stargardt disease. *Am J Hum Genet* 1999; 64: 422-434.
14. Maugeri A, van Driel MA, van de Pol DJ, et al: The 2588G>C mutation in the ABCR gene is a mild frequent founder mutation in the Western European population and allows the classification of ABCR mutations in patients with Stargardt disease. *Am J Hum Genet* 1999; 64: 1024-1035.
15. Glöckle N, Kohl S, Mohr J, et al: Panel-based next generation sequencing as a reliable and efficient technique to detect mutations in unselected patients with retinal dystrophies. *Eur J Hum Genet* 2014; 22: 99-104.
16. Ramsden SC, O'Grady A, Fletcher T, et al: A clinical molecular genetic service for United Kingdom families with choroideraemia. *Eur J Med Genet* 2013; 56: 432-438.
17. Vallespin E, Cantalapiedra D, Garcia-Hoyos M, et al: Gene symbol: CRB1. Disease: Leber congenital amaurosis. Accession #Hd0510. *Hum Genet* 2006; 118: 774.
18. Bernal S, Calaf M, Garcia-Hoyos M, et al: Study of the involvement of the RGR, CRPB1, and CRB1 genes in the pathogenesis of autosomal recessive retinitis pigmentosa. *J Med Genet* 2003; 40: e89.
19. Bujakowska K, Audo I, Mohand-Saïd S, et al: CRB1 mutations in inherited retinal dystrophies. *Hum Mutat* 2012; 33: 306-315.
20. Pusch CM, Zeitz C, Brandau O, et al: The complete form of X-linked congenital stationary night blindness is caused by mutations in a gene encoding a leucine-rich repeat protein. *Nat Genet* 2000; 26: 324-327.
21. Zito I, Allen LE, Patel RJ, et al: Mutations in the CACNA1F and NYX genes in British CSNBX families. *Hum Mutat* 2003; 21: 169.
22. Bech-Hansen NT, Naylor MJ, Maybaum TA, et al: Mutations in NYX, encoding the leucine-rich proteoglycan nyctalopin, cause X-linked complete congenital stationary night blindness. *Nat Genet* 2000; 26: 319-323.
23. Zeitz C, Labs S, Lorenz B, et al: Genotyping microarray for CSNB-associated genes. *Invest Ophthalmol Vis Sci* 2009; 50: 5919-5926.

24. Jacobson SG, Cideciyan AV, Kemp CM, Sheffield VC, Stone EM: Photoreceptor function in heterozygotes with insertion or deletion mutations in the RDS gene. *Invest Ophthalmol Vis Sci* 1996; 37: 1662-1674.
25. Jacobson SG, Kemp CM, Cideciyan AV, et al: Spectrum of functional phenotypes in RDS gene mutations. *Invest Ophthalmol Vis Sci* 1994; 35: 1479A.
26. Farrar GJ, Kenna P, Jordan SA, et al: A three-base-pair deletion in the peripherin-RDS gene in one form of retinitis pigmentosa. *Nature* 1991; 354: 478-480.
27. Weleber RG, Carr RE, Murphey WH, Sheffield VC, Stone EM: Phenotypic variation including retinitis pigmentosa, pattern dystrophy, and fundus flavimaculatus in a single family with a deletion of codon 153 or 154 of the peripherin/RDS gene. *Arch Ophthalmol* 1993; 111: 1531-1542.
28. van Lith-Verhoeven JJ, van den Helm B, Deutman AF, et al: A peculiar autosomal dominant macular dystrophy caused by an asparagine deletion at codon 169 in the peripherin/RDS gene. *Arch Ophthalmol* 2003; 121: 1452-1457.
29. Gannon AM, Rodriguez JA, Humphries P, Birch DG, Heckenlively JR, Daiger SP: Mutations in peripherin/RDS in patients with retinitis pigmentosa: a 12 base-pair deletion in exon 2. *Am J Hum Genet* 1993 (Suppl.).
30. Kalyanasundaram TS, Black GC, O'Sullivan J, Bishop PN: A novel peripherin/RDS mutation resulting in a retinal dystrophy with phenotypic variation. *Eye (Lond)* 2009; 23: 237-239.
31. Kajiwara K, Hahn LB, Mukai S, Travis GH, Berson EL, Dryja TP: Mutations in the human retinal degeneration slow gene in autosomal dominant retinitis pigmentosa. *Nature* 1991; 354: 480-483.
32. Gamundi MJ, Hernan I, Muntanyola M, et al: High prevalence of mutations in peripherin/RDS in autosomal dominant macular dystrophies in a Spanish population. *Mol Vis* 2007; 13: 1031-1037.
33. Jin ZB, Mandai M, Yokota T, et al: Identifying pathogenic genetic background of simplex or multiplex retinitis pigmentosa patients: a large scale mutation screening study. *J Med Genet* 2008; 45: 465-472.
34. Heinzmann C, Kojis TL, Flodman P, et al: Novel nine base-pair deletion in the third exon of RDS/peripherin causative of autosomal dominant retinitis pigmentosa in a large Mexican family (UCLA-RP12). *Am J Hum Genet.* 1995; 57: A214.
35. Neidhardt J, Glaus E, Lorenz B, et al: Identification of novel mutations in X-linked retinitis pigmentosa families and implications for diagnostic testing. *Mol Vis* 2008; 14: 1081-1093.
36. Schwahn U, Lenzner S, Dong J, et al: Positional cloning of the gene for X-linked retinitis pigmentosa 2 *Nat Genet* 1998; 19: 327-332.
37. Sharon D, Bruns GA, McGee TL, et al: X-linked retinitis pigmentosa: mutation spectrum of the RPGR and RP2 genes and correlation with visual function. *Invest Ophthalmol Vis Sci* 2000; 41: 2712-2721.
38. Sitorus RS, Lorenz B, Preising MN: Analysis of three genes in Leber congenital amaurosis in Indonesian patients. *Vision Res* 2003; 43: 3087-3093.



39. Coppieters F, Casteels I, Meire F, et al: Genetic screening of LCA in Belgium: predominance of CEP290 and identification of potential modifier alleles in AHI1 of CEP290-related phenotypes. *Hum Mutat* 2010; 31: E1709-1766.
40. Hamel CP, Griffoin JM, Bazalgette C, et al: [Molecular genetics of pigmentary retinopathies: identification of mutations in CHM, RDS, RHO, RPE65, USH2A and XLR51 genes]. *J Fr Ophtalmol* 2000; 23: 985-995.
41. Hirianna KT, Bingham EL, Yashar BM, et al: Novel mutations in XLR51 causing retinoschisis, including first evidence of putative leader sequence change. *Hum Mutat* 1999; 14: 423-427.
42. Bowles K, Cukras C, Turriff A, et al: X-linked retinoschisis: RS1 mutation severity and age affect the ERG phenotype in a cohort of 68 affected male subjects. *Invest Ophthalmol Vis Sci* 2011; 52: 9250-9256.
43. Hewitt AW, FitzGerald LM, Scotter LW, Mulhall LE, McKay JD, Mackey DA: Genotypic and phenotypic spectrum of X-linked retinoschisis in Australia. *Clin Experiment Ophthalmol* 2005; 33: 233-239.
44. Vincent A, Robson AG, Neveu MM, et al. A phenotype-genotype correlation study of X-linked retinoschisis. *Ophthalmology* 2013; 120: 1454-1464.
